# Supplementary material for: Greenhouse Gas (GHG) Emissions from Honey Production: Two-Year Survey in Italian Beekeeping Farms
Source: MDPI journal article supplement (doi:10.3390/ani13040766), 2023-02-20
Supplement: s1 [file s1]

animals-2104482 Supplementary Materials

**Table S1.** Life Cycle Inventory (CI) inputs and outputs.

| Life Cycle Phases       | Inputs               | Outputs                                                       |
|-------------------------|----------------------|---------------------------------------------------------------|
| Hive placement (winter) | Beehives             | Beehives with honeybees                                       |
|                         | Wooden frame         |                                                               |
|                         | Beehive paint        |                                                               |
|                         | Supplemental feeding |                                                               |
|                         | Beeswax              |                                                               |
|                         | Medication           |                                                               |
|                         | Electricity          |                                                               |
|                         | Beekeeping equipment |                                                               |
| Hive placement (summer) | Transportation       | Beehives filled with honey<br>Co-products:<br>honeycombs      |
|                         | Beehives             |                                                               |
|                         | Wooden frame         |                                                               |
|                         | Beehive paint        |                                                               |
|                         | Supplemental feeding |                                                               |
|                         | Beeswax              |                                                               |
|                         | Medication           |                                                               |
|                         | Beekeeping equipment |                                                               |
| Honey extraction        | Transportation       | Honey<br>Co-products:<br>beeswax,<br>propolis,<br>royal jelly |
|                         | Uniform              |                                                               |
|                         | Gloves               |                                                               |
|                         | Lab coats            |                                                               |
|                         | Electricity          |                                                               |
|                         | Water                |                                                               |
|                         | Machines             |                                                               |
|                         | Filters              |                                                               |

| 2020                                        |          |        |        |        |        |        |        | 2021   |        |        |        |        |        |
|---------------------------------------------|----------|--------|--------|--------|--------|--------|--------|--------|--------|--------|--------|--------|--------|
| Inputs                                      | Unit     | Farm 1 | Farm 2 | Farm 3 | Farm 4 | Farm 5 | Farm 6 | Farm 1 | Farm 2 | Farm 3 | Farm 4 | Farm 5 | Farm 6 |
| Transport for<br>hive placement<br>(winter) | km/hive  | 109.0  | 22.0   | 12.0   | 0      | 0      | 0      | 110.0  | 5.2    | 16.0   | 0      | 0      | 0      |
| Transport for<br>hive placement<br>(summer) | km/hive  | 41.0   | 23.0   | 14.0   | 0      | 0      | 0      | 12.0   | 5.2    | 14.0   | 0      | 0      | 0      |
| Medication                                  | gr/hive  | 66.0   | 66.0   | 51.0   | 2.4    | 53.0   | 28.7   | 356.1  | 53.2   | 1002.6 | 1.1    | 81.8   | 28.3   |
| Supplemental<br>feeding                     | kg/hive  | 15.0   | 13.0   | 0.7    | 1.2    | 2.0    | 1.5    | 15.0   | 17.0   | 4.0    | 10     | 3      | 1.5    |
| Electricity<br>(Maintain the<br>frames)     | kWh/hive | 3.54   | 3.52   | 4.03   | 1.67   | 3.55   | 3.54   | 0.94   | 0.24   | 3.06   | 0.1    | 0.9    | 1.1    |
| Beekeeping<br>equipment                     | kg/hive  | 1.2    | 1.2    | 0.4    | 0.1    | 0.4    | 0.1    | 0.7    | 1.6    | 0.9    | 0.6    | 0.8    | 0.1    |
| Wood<br>(Wooden frame)                      | m³/hive  | 0.1    | 0.1    | 0.1    | 0.1    | 0.1    | 0.1    | 0.1    | 0.1    | 0.1    | 0.1    | 0.1    | 0.1    |
| Beehive Paint                               | kg/hive  | 0.1    | 0.1    | 0.1    | 0.1    | 0.1    | 0.1    | 0.1    | 0.1    | 0.1    | 0.1    | 0.1    | 0.1    |
| Outputs                                     | Amount   | Unit   |        |        |        |        |        |        |        |        |        |        |        |
| Hive                                        | One      | Item   |        |        |        |        |        |        |        |        |        |        |        |

| 2020                                                           |           |          |        |        |        |        |        | 2021   |        |        |        |        |        |
|----------------------------------------------------------------|-----------|----------|--------|--------|--------|--------|--------|--------|--------|--------|--------|--------|--------|
| Inputs                                                         | Unit      | Farm 1   | Farm 2 | Farm 3 | Farm 4 | Farm 5 | Farm 6 | Farm 1 | Farm 2 | Farm 3 | Farm 4 | Farm 5 | Farm 6 |
| Water                                                          | l/honey   | 30.0     | 29.0   | 61.0   | 4.4    | 22.4   | 17.4   | 14.5   | 25.0   | 66.0   | 6.4    | 14.6   | 0.3    |
| Electricity ( <i>Honey extraction</i> )                        | kWh/honey | 0.7      | 0.5    | 0.6    | 0.3    | 0.5    | 0.4    | 0.4    | 0.8    | 1.2    | 0.7    | 0.5    | 0.6    |
| Beekeeping<br>Clothing<br>( <i>Uniform, gloves, lab coat</i> ) | gr/honey  | 0.1      | 0.1    | 0.1    | 0.1    | 0.1    | 0.1    | 0.1    | 0.1    | 0.1    | 0.1    | 0.1    | 0.1    |
| Honey Extraction<br>equipment<br>( <i>Machines</i> )           | kg/honey  | 0.1      | 0.2    | 0.2    | 0.2    | 0.2    | 0.1    | 0.2    | 0.5    | 0.4    | 0.2    | 0.6    | 1.1    |
| Outputs                                                        | Amount    | Unit     |        |        |        |        |        |        |        |        |        |        |        |
| Honey                                                          | One       | kilogram |        |        |        |        |        |        |        |        |        |        |        |

Table S4. Collecting meteorological data.

|                   | Temperature | Temperature | Precipitation      | Precipitation      | Days with Rain | Days with Rain |
|-------------------|-------------|-------------|--------------------|--------------------|----------------|----------------|
|                   | <i>Mean</i> | <i>Mean</i> | <i>Millimeters</i> | <i>Millimeters</i> | <i>Number</i>  | <i>Number</i>  |
|                   | 2020        | 2021        | 2020               | 2021               | 2020           | 2021           |
| 44°25' N 10°12' E |             |             |                    |                    |                |                |
| Jan               | 10.1        | 4.3         | 63.8               | 261.0              | 8              | 13             |
| Feb               | 12.2        | 7.9         | 65.2               | 134.4              | 8              | 11             |
| Mar               | 12.1        | 8.6         | 133.8              | 26.6               | 9              | 5              |
| Apr               | 17.7        | 10.2        | 49.0               | 129.2              | 2              | 10             |
| May               | 21.7        | 13.2        | 85.0               | 160.8              | 7              | 15             |
| Jun               | 23.1        | 20.4        | 183.2              | 26.8               | 8              | 4              |
| Jul               | 27.5        | 22.3        | 23.2               | 40.6               | 3              | 5              |
| Aug               | 27.6        | 22.1        | 151.0              | 90.2               | 6              | 8              |
| Sep               | 23.8        | 19.7        | 58.2               | 275.6              | 8              | 6              |
| Oct               | 16.0        | 13.4        | 241.2              | 93.8               | 13             | 6              |
| Nov               | 14.1        | 9.7         | 43.4               | 154.0              | 8              | 12             |
| Dec               | 8.7         | 6.3         | 424.6              | 139.4              | 21             | 12             |
|                   | 17.9        | 13.2        | 1521.6             | 1532.4             | 101            | 107            |
| 44°40' N 10°27' E |             |             |                    |                    |                |                |
| Jan               | 4.4         | 1.7         | 13.0               | 207.6              | 5              | 14             |
| Feb               | 7.5         | 5.0         | 14.8               | 82.4               | 4              | 9              |
| Mar               | 5.6         | 6.0         | 155.8              | 6.6                | 15             | 3              |
| Apr               | 10.4        | 8.0         | 65.6               | 110.4              | 5              | 12             |
| May               | 14.8        | 13.2        | 98.2               | 77.8               | 10             | 10             |
| Jun               | 17.5        | 20.0        | 96.6               | 56.6               | 13             | 3              |
| Jul               | 20.7        | 21.7        | 52.4               | 17.8               | 6              | 6              |
| Aug               | 21.5        | 21.0        | 177.4              | 42.0               | 7              | 4              |
| Sep               | 16.6        | 17.3        | 69.0               | 168.2              | 10             | 5              |
| Oct               | 10.5        | 10.2        | 172.4              | 57.2               | 17             | 9              |
| Nov               | 7.3         | 6.5         | 32.0               | 181.8              | 5              | 19             |
| Dec               | 3.2         | 3.7         | 378.6              | 79.4               | 21             | 14             |
|                   | 11.7        | 11.2        | 1325.8             | 1087.8             | 118            | 108            |
| 43°78' N 11°32' E |             |             |                    |                    |                |                |
| Jan               | 7.9         | 6.4         | 51.8               | 144.2              | 5              | 15             |
| Feb               | 10.1        | 9.7         | 32.0               | 79.2               | 5              | 7              |
| Mar               | 10.4        | 10.5        | 57.6               | 4.0                | 5              | 1              |
| Apr               | 14.4        | 12.3        | 36.6               | 83.2               | 4              | 7              |
| May               | 18.9        | 16.7        | 61.6               | 57.0               | 7              | 11             |
| Jun               | 21.4        | 23.6        | 41.8               | 12.4               | 8              | 3              |
| Jul               | 25.2        | 25.6        | 24.6               | 14.6               | 2              | 1              |
| Aug               | 26.3        | 25.7        | 26.8               | 17.6               | 3              | 3              |
| Sep               | 22.1        | 21.8        | 38.0               | 68.8               | 8              | 6              |
| Oct               | 14.6        | 15.6        | 169.4              | 33.4               | 10             | 3              |
| Nov               | 12.3        | 12.3        | 25.4               | 111.4              | 5              | 14             |
| Dec               | 8.2         | 7.7         | 160.0              | 167.2              | 17             | 4              |
|                   | 16.0        | 15.7        | 725.6              | 793.0              | 79             | 75             |
| 44°66' N 11°33' E |             |             |                    |                    |                |                |
| Jan               | 3.0         | 2.0         | 21.6               | 32.8               | 16             | 17             |

|                   |      |      |       |       |     |     |
|-------------------|------|------|-------|-------|-----|-----|
| Feb               | 6.8  | 6.4  | 1.2   | 16.0  | 6   | 9   |
| Mar               | 8.5  | 7.5  | 18.8  | 9.0   | 11  | 5   |
| Apr               | 12.8 | 10.6 | 23.2  | 46.6  | 3   | 1   |
| May               | 18.2 | 16.2 | 15.2  | 45.0  | 8   | 3   |
| Jun               | 20.8 | 23.0 | 70.4  | 27.4  | 10  | 4   |
| Jul               | 23.8 | 25.0 | 62.8  | 51.8  | 9   | 6   |
| Aug               | 24.8 | 24.6 | 128.4 | 62.8  | 10  | 6   |
| Sep               | 20.2 | 20.5 | 66.8  | 24.8  | 13  | 6   |
| Oct               | 13.3 | 13.2 | 65.2  | 11.2  | 17  | 6   |
| Nov               | 8.6  | 9.1  | 24.2  | 88.0  | 14  | 20  |
| Dec               | 5.0  | 2.4  | 151.6 | 25.2  | 21  | 16  |
|                   | 13.8 | 13.4 | 649.4 | 440.6 | 138 | 99  |
| 44°81' N 10°80' E |      |      |       |       |     |     |
| Jan               | 3.4  | 1.7  | 20.4  | 50.2  | 17  | 17  |
| Feb               | 7.6  | 6.3  | 1.2   | 23.8  | 5   | 9   |
| Mar               | 8.9  | 7.8  | 38.2  | 1.0   | 8   | 5   |
| Apr               | 14.0 | 11.0 | 22.6  | 59.4  | 5   | 14  |
| May               | 19.8 | 16.6 | 25.0  | 56.2  | 9   | 8   |
| Jun               | 21.7 | 23.3 | 27.8  | 48.4  | 8   | 4   |
| Jul               | 24.4 | 24.6 | 66.2  | 15.8  | 6   | 6   |
| Aug               | 25.2 | 23.7 | 77.2  | 29.6  | 7   | 6   |
| Sep               | 21.3 | 19.7 | 66.0  | 42.2  | 10  | 6   |
| Oct               | 13.3 | 12.3 | 90.8  | 28.0  | 13  | 6   |
| Nov               | 8.8  | 8.6  | 20.0  | 108.2 | 11  | 19  |
| Dec               | 4.5  | 1.9  | 167.6 | 65.0  | 11  | 15  |
|                   | 14.4 | 13.1 | 623.0 | 527.8 | 110 | 115 |
| 44°50' N 10°45' E |      |      |       |       |     |     |
| Jan               | 2.7  | 1.7  | 24.4  | 50.2  | 18  | 17  |
| Feb               | 7.1  | 6.3  | 1.0   | 23.8  | 7   | 8   |
| Mar               | 8.4  | 7.8  | 32.4  | 1.0   | 12  | 3   |
| Apr               | 12.9 | 11.0 | 39.4  | 59.4  | 6   | 8   |
| May               | 18.4 | 16.6 | 22.6  | 56.2  | 6   | 8   |
| Jun               | 20.9 | 23.3 | 80.8  | 48.4  | 9   | 2   |
| Jul               | 23.9 | 24.6 | 86.4  | 15.8  | 9   | 6   |
| Aug               | 24.6 | 23.7 | 141.2 | 29.6  | 6   | 5   |
| Sep               | 19.7 | 19.7 | 36.2  | 42.2  | 9   | 8   |
| Oct               | 12.8 | 12.3 | 87.6  | 28.0  | 10  | 6   |
| Nov               | 8.3  | 8.6  | 21.2  | 108.2 | 18  | 23  |
| Dec               | 4.6  | 1.9  | 196.2 | 65.0  | 14  | 21  |
|                   | 13.7 | 13.1 | 769.4 | 527.8 | 124 | 115 |

**Table S5.** Contributions to Carbon Footprint (% of total impact) of honey production and yield in the two years of survey.

|        | 2020                                      |                   |                                     |                   |                                     |                   | 2021                                      |                   |                                     |                   |                                     |                   |
|--------|-------------------------------------------|-------------------|-------------------------------------|-------------------|-------------------------------------|-------------------|-------------------------------------------|-------------------|-------------------------------------|-------------------|-------------------------------------|-------------------|
|        | Hive Management<br>(Spring-Summer Season) |                   | Hive Management (Winter<br>Season)  |                   | Honey Extraction                    |                   | Hive Management<br>(Spring-Summer Season) |                   | Hive Management (Winter<br>Season)  |                   | Honey Extraction                    |                   |
|        | Kg CO <sub>2</sub> e/kg<br>of Honey       | % Total<br>Impact | Kg CO <sub>2</sub> e/kg<br>of Honey | % Total<br>Impact | Kg CO <sub>2</sub> e/kg<br>of Honey | % Total<br>Impact | Kg CO <sub>2</sub> e/kg<br>of Honey       | % Total<br>Impact | Kg CO <sub>2</sub> e/kg<br>of Honey | % Total<br>Impact | Kg CO <sub>2</sub> e/kg<br>of Honey | % Total<br>Impact |
| Farm 1 | 1.19                                      | 55%               | 0.59                                | 27%               | 0.39                                | 18%               | 1.72                                      | 41%               | 2.23                                | 53%               | 0.24                                | 6%                |
| Farm 2 | 0.87                                      | 48%               | 0.56                                | 32%               | 0.35                                | 20%               | 1.22                                      | 42%               | 1.22                                | 42%               | 0.47                                | 16%               |
| Farm 3 | 0.68                                      | 43%               | 0.44                                | 28%               | 0.45                                | 28%               | 0.9                                       | 42%               | 0.46                                | 21%               | 0.81                                | 37%               |
| Farm 4 | 0.026                                     | 6%                | 0.14                                | 33%               | 0.25                                | 61%               | 0.25                                      | 26%               | 0.26                                | 26%               | 0.46                                | 48%               |
| Farm 5 | 0.007                                     | 2%                | 0.17                                | 37%               | 0.28                                | 61%               | 0.03                                      | 4%                | 0.36                                | 47%               | 0.38                                | 49%               |
| Farm 6 | 0.006                                     | 2%                | 0.12                                | 34%               | 0.24                                | 64%               | 0.004                                     | 2%                | 0.1                                 | 19%               | 0.41                                | 79%               |
